# Supplementary material
Source: publisher figshare collection journal article supplement (https://acs.figshare.com/ndownloader/files/5752509)
Supplement: Supplementary file 1 [file 5752509]

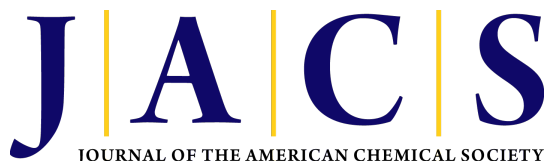

J | A | C | S  
JOURNAL OF THE AMERICAN CHEMICAL SOCIETY

J. Am. Chem. Soc., 1996, 118(48), 12242-12243, DOI: [10.1021/ja962863r](https://doi.org/10.1021/ja962863r)

#### Terms & Conditions

Electronic Supporting Information files are available without a subscription to ACS Web Editions. The American Chemical Society holds a copyright ownership interest in any copyrightable Supporting Information. Files available from the ACS website may be downloaded for personal use only. Users are not otherwise permitted to reproduce, republish, redistribute, or sell any Supporting Information from the ACS website, either in whole or in part, in either machine-readable form or any other form without permission from the American Chemical Society. For permission to reproduce, republish and redistribute this material, requesters must process their own requests via the RightsLink permission system. Information about how to use the RightsLink permission system can be found at <http://pubs.acs.org/page/copyright/permissions.html>

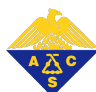

ACS Publications

MOST TRUSTED. MOST CITED. MOST READ.

Copyright © 1996 American Chemical Society

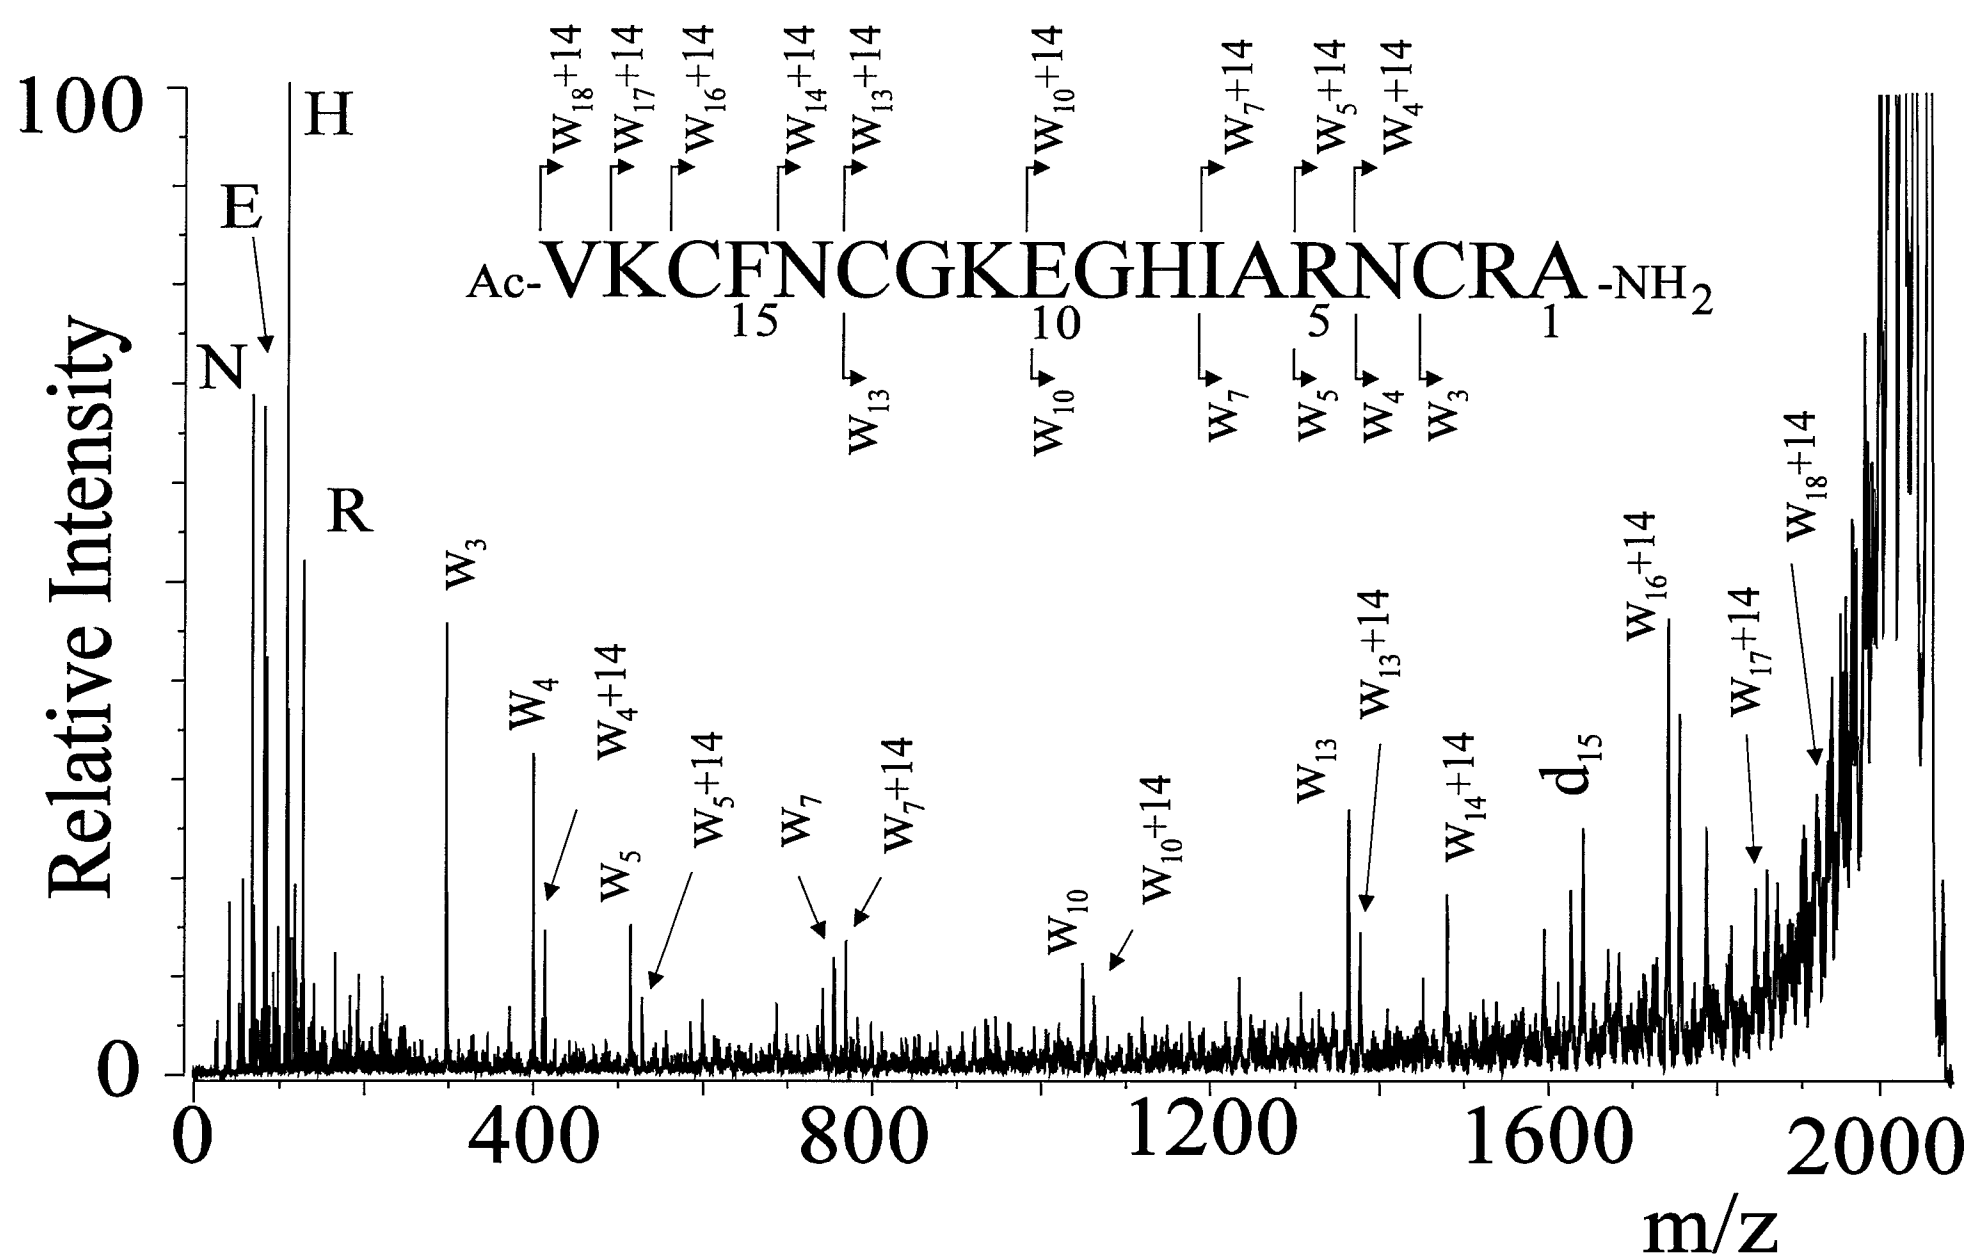

# Supporting Information: High Energy CID Spectrum of the Monomethylated Zinc Finger F1

Retention of Thiol Protons in Two Classes of Protein Zinc Ion Coordination Centers

D. Fabris, J. Zaia, Y. Hathout, and C. Fenselau

Dept. of Chemistry and Biochemistry, University of Maryland Baltimore County, Baltimore MD 21250
